# Supplementary material
Source: publisher figshare collection journal article supplement (https://tandf.figshare.com/ndownloader/files/18235664)

## Appendix A: The North Wales Economy

Figure A1 – List of interviewees

| Interviewee   | Organisation                                                     |
|---------------|------------------------------------------------------------------|
| Mike Learmond | FSB                                                              |
| Ffion Jones   | North Wales Economic Ambitions Board (NWEAB)                     |
| Nerys Bourne  | Careers Wales                                                    |
| Tudur Jones   | Anglesey Council                                                 |
| Iestyn Davies | ColegauCymru                                                     |
| Rachel Bowen  | ColegauCymru                                                     |
| Arwel Jones   | NW Wales based consultant with sustainable development expertise |
| Sean Taylor   | Zipworld creative director                                       |
| Simon Duffy   | Centre for Welfare Reform                                        |

Figure A2 – North Wales and surrounding city regions

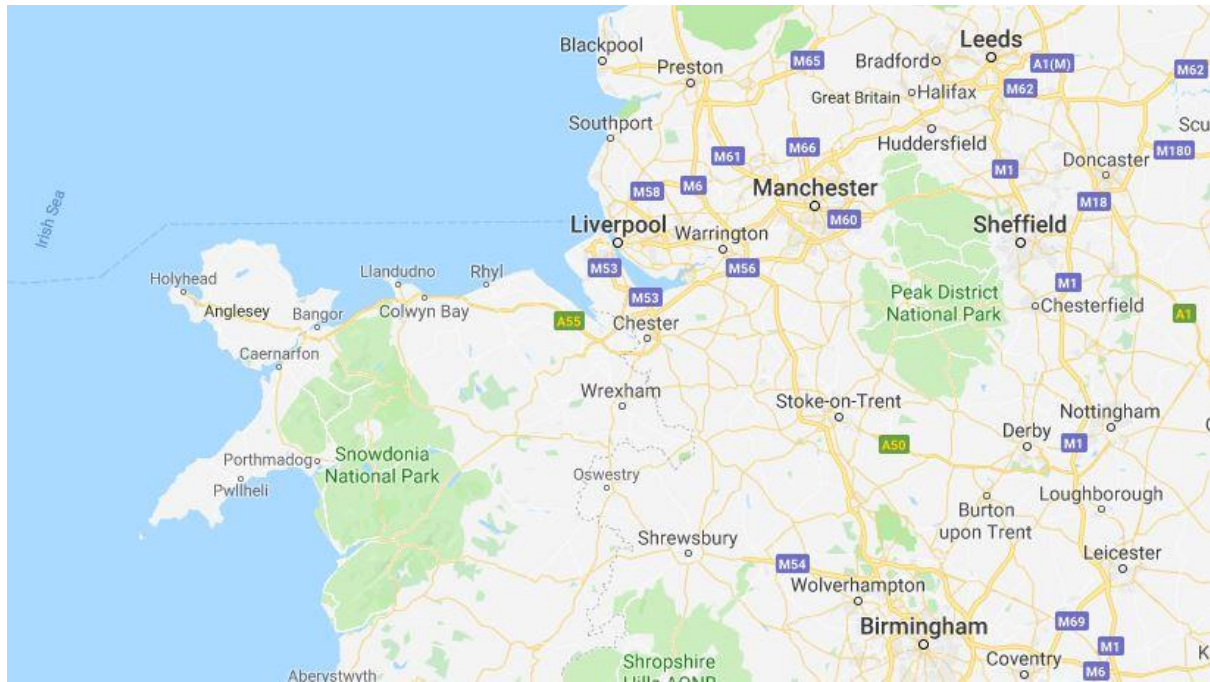

Figure A3 – Overview of latest North Wales Economic Data (Welsh Government, 2018)

|                                      | North Wales     |                   |         |                                  | Wales   |                                  |
|--------------------------------------|-----------------|-------------------|---------|----------------------------------|---------|----------------------------------|
|                                      | Level<br>(000s) | Change<br>on year | Rate    | Change<br>on year <sup>(7)</sup> | Rate    | Change<br>on year <sup>(7)</sup> |
| Employed <sup>(1)</sup>              | 325.7           | 9.3               | 75.4%   | 2.4                              | 72.7%   | 1.3                              |
| Unemployed <sup>(2)</sup>            | 12.3            | 0.1               | 3.6%    | -0.1                             | 4.9%    | 0.4                              |
| Economically Inactive <sup>(3)</sup> | 68.7            | -7.4              | 18.3%   | -1.8                             | 19.8%   | -0.9                             |
| GVA per head <sup>(4)</sup>          | .               | .                 | £19,573 | 2.8                              | £19,140 | 3.5                              |
| GDHI per head <sup>(5)</sup>         | .               | .                 | £16,502 | 0.8                              | £15,835 | 0.7                              |
| Average earnings <sup>(6)</sup>      | .               | .                 | £484.10 | -2.4                             | £498.40 | 1.0                              |

(1) Levels are for those aged 16 and over, rates are for those aged 16-64. Data relate to the year to March 2018.

(2) Levels and rates are for those aged 16 and over using the International Labour Organisation's (ILO) definition of unemployment, rates are a proportion of the economically active. Data relate to the year to March 2018.

(3) Levels and rates exclude students and are for those aged 16-64. Data relate to the year to March 2018.

(4) Data relate to 2016 and are provisional.

(5) Data relate to 2016 and are provisional.

(6) Average (median) gross weekly earnings. Data relate to 2017 and are provisional.

(7) Percentage point change for employed, ILO unemployed and economically inactive. Percentage change for GVA per head, GDHI per head and average earnings.

. Not applicable

Figure A4 – Employment levels, year to March 2018 (Welsh Government, 2018)

| <i>(levels in thousands)</i> |                     |                           |                 |                      |                                |                 |                      |
|------------------------------|---------------------|---------------------------|-----------------|----------------------|--------------------------------|-----------------|----------------------|
|                              | Year to<br>Mar 2018 | Compared to previous year |                 |                      | Compared to earliest available |                 |                      |
|                              |                     | Year to<br>Mar 2017       | Level<br>Change | Percentage<br>Change | 2001                           | Level<br>Change | Percentage<br>Change |
| <b>North Wales</b>           | <b>325.7</b>        | <b>316.4</b>              | <b>9.3</b>      | <b>3.0</b> ↑         | <b>292.6</b>                   | <b>33.1</b>     | <b>11.3</b> ↑        |
| Isle of Anglesey             | 31.8                | 30.2                      | 1.6             | 5.3 ↑                | 28.2                           | 3.6             | 12.8 ↑               |
| Gwynedd                      | 58.1                | 57.5                      | 0.6             | 1.0 ↑                | 49.2                           | 8.9             | 18.1 ↑               |
| Conwy                        | 50.9                | 49.7                      | 1.2             | 2.3 ↑                | 45.5                           | 5.4             | 11.9 ↑               |
| Denbighshire                 | 41.8                | 41.6                      | 0.3             | 0.6 ↑                | 40.7                           | 1.1             | 2.8 ↑                |
| Flintshire                   | 75.1                | 70.6                      | 4.5             | 6.4 ↑                | 69.6                           | 5.5             | 7.9 ↑                |
| Wrexham                      | 67.9                | 66.7                      | 1.2             | 1.8 ↑                | 59.4                           | 8.5             | 14.4 ↑               |
| <b>Wales</b>                 | <b>1,437.4</b>      | <b>1,416.9</b>            | <b>20.5</b>     | <b>1.4</b> ↑         | <b>1,238.6</b>                 | <b>198.8</b>    | <b>16.1</b> ↑        |
| United Kingdom               | 32,003.9            | 31,571.1                  | 432.8           | 1.4 ↑                | 27,433.1                       | 4,570.8         | 16.7 ↑               |

Source: Welsh Government analysis of Labour Force Survey (LFS)/Annual Population Survey (APS), ONS  
(a) Employment levels for those aged 16 and over.

Figure A5 – Unemployment levels, year to March 2018 (Welsh Government, 2018)

| <i>(levels in thousands)</i> |                     |                           |                 |                      |                                |                 |                      |
|------------------------------|---------------------|---------------------------|-----------------|----------------------|--------------------------------|-----------------|----------------------|
|                              | Year to<br>Mar 2018 | Compared to previous year |                 |                      | Compared to earliest available |                 |                      |
|                              |                     | Year to<br>Mar 2017       | Level<br>Change | Percentage<br>Change | 2001                           | Level<br>Change | Percentage<br>Change |
| <b>North Wales</b>           | <b>12.3</b>         | <b>12.2</b>               | <b>0.1</b>      | <b>0.7</b> ↑         | <b>13.5</b>                    | <b>-1.2</b>     | <b>-8.9</b> ↓        |
| Isle of Anglesey             | 1.1                 | 1.8                       | -0.7            | -37.1 ↓              | 1.5                            | -0.4            | -24.3 ↓              |
| Gwynedd                      | 1.5                 | 3.1                       | -1.5            | -49.9 ↓              | 2.7                            | -1.2            | -43.4 ↓              |
| Conwy                        | 2.4                 | 2.0                       | 0.4             | 21.3 ↑               | 1.6                            | 0.8             | 47.6 ↑               |
| Denbighshire                 | 1.5                 | 1.4                       | 0.1             | 7.2 ↑                | 1.8                            | -0.3            | -16.6 ↓              |
| Flintshire                   | 2.0                 | 1.9                       | 0.1             | 5.1 ↑                | 3.7                            | -1.7            | -46.3 ↓              |
| Wrexham                      | 3.8                 | 2.1                       | 1.7             | 78.6 ↑               | 2.2                            | 1.6             | 72.1 ↑               |
| <b>Wales</b>                 | <b>73.4</b>         | <b>65.4</b>               | <b>7.9</b>      | <b>12.1</b> ↑        | <b>71.0</b>                    | <b>2.4</b>      | <b>3.4</b> ↑         |
| United Kingdom               | 1,436.8             | 1,571.1                   | -134.3          | -8.5 ↓               | 1,450.3                        | -13.5           | -0.9 ↓               |

Source: Welsh Government analysis of Labour Force Survey (LFS)/Annual Population Survey (APS), ONS  
(a) Unemployment levels for those aged 16 and over (ILO definition of unemployment).

Figure A6 – Annual (Median) full-time weekly earnings, 2017 (Welsh Government, 2018)

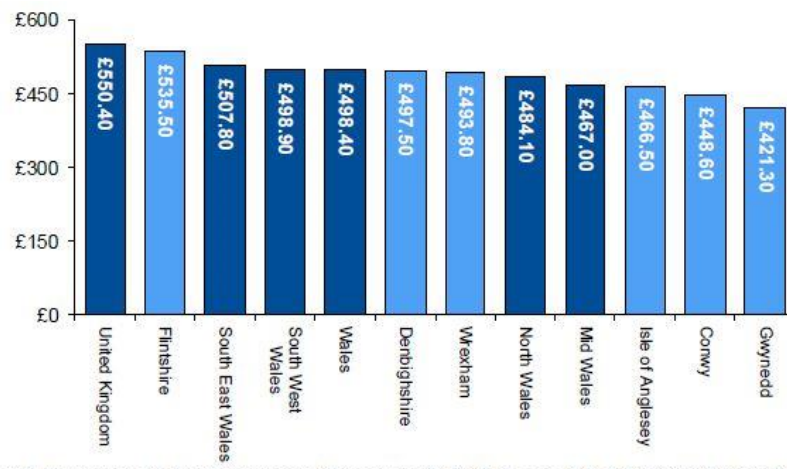

(a) Average (median) gross weekly earnings (including overtime) for full time adults whose pay was unaffected by absence.

Figure A7 – Gross Disposable Household Income (GDHI) NUTS3 level, 2016 (Welsh Government, 2018)

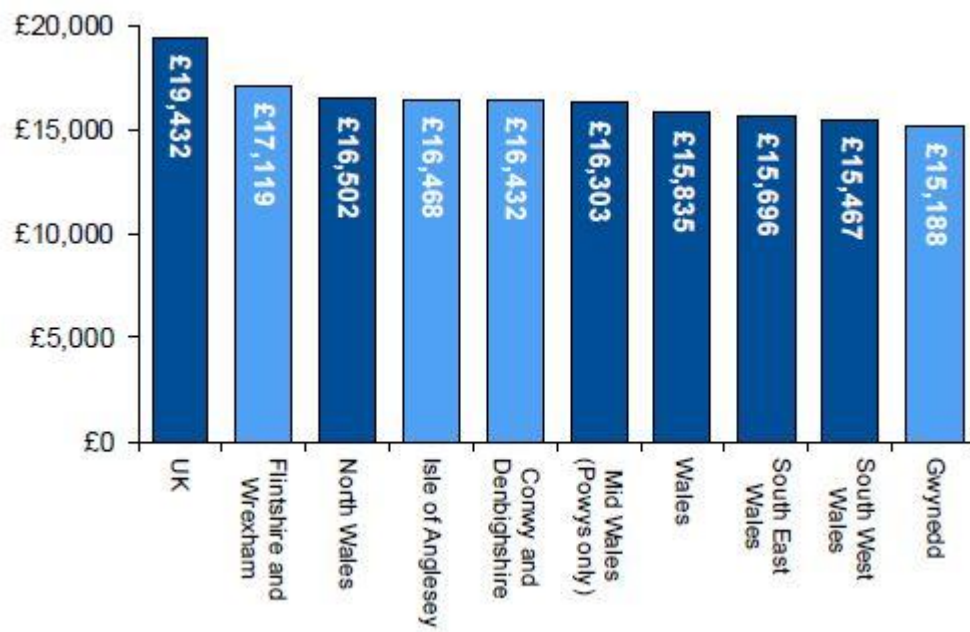



Figure A8 – NWGD proposed projects (NWAB, 2018)

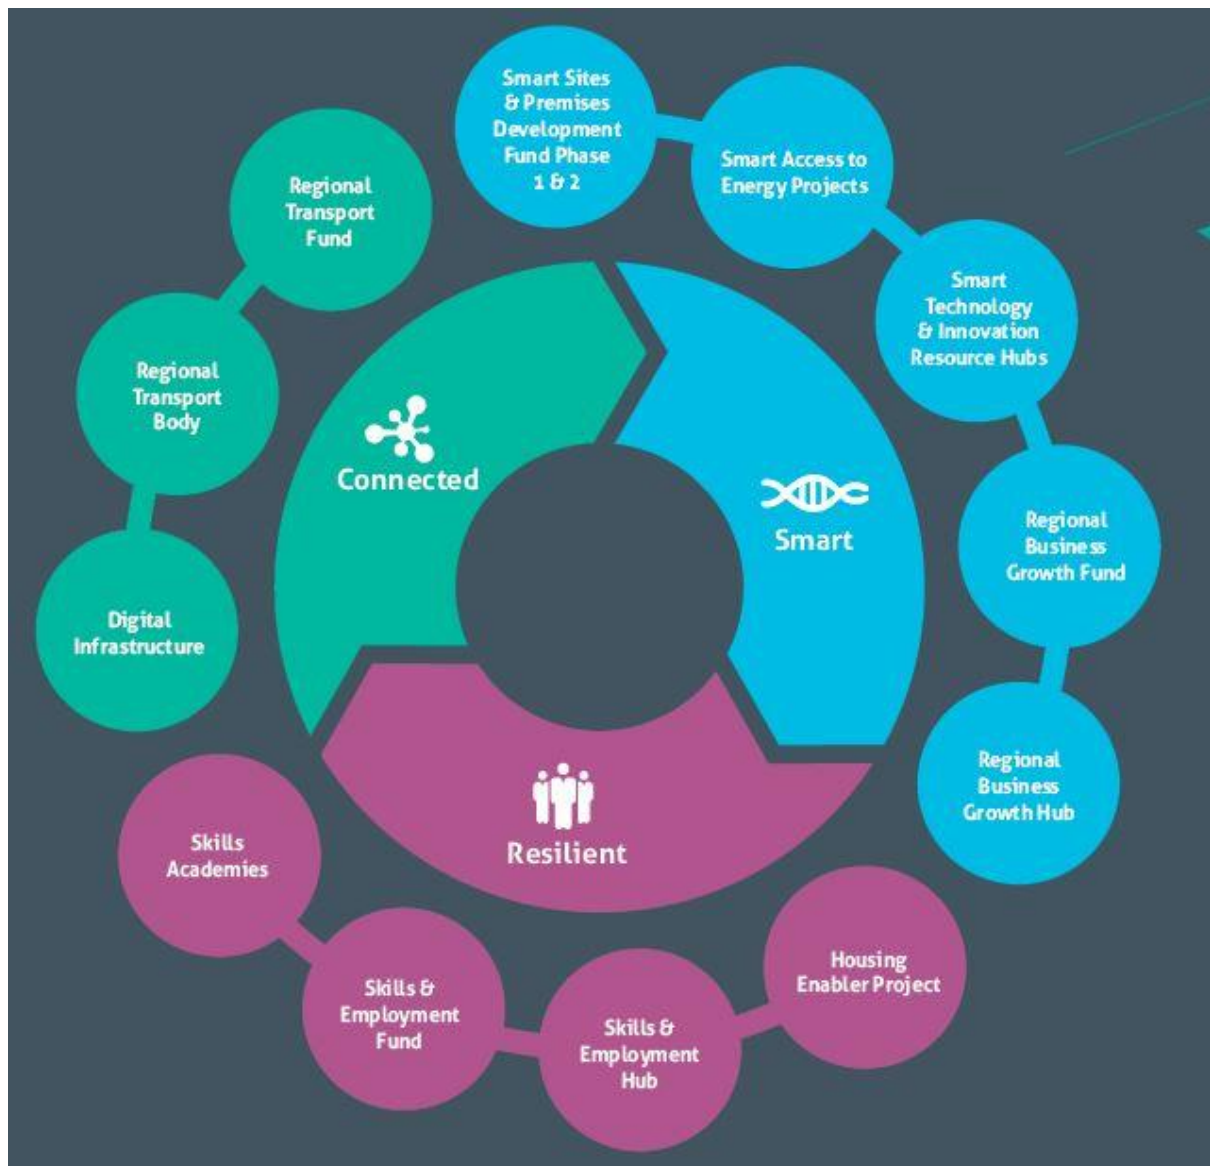

Supplement: Supplementary file 1 [file 18235664]
